# Supplementary material for: Identification of Insulin Resistance Biomarkers in Metabolic Syndrome Detected by UHPLC-ESI-QTOF-MS
Source: MDPI journal article supplement (doi:10.3390/metabo12060508), 2022-06-01
Supplement: s1 [file s1]

# Supplementary supporting Data

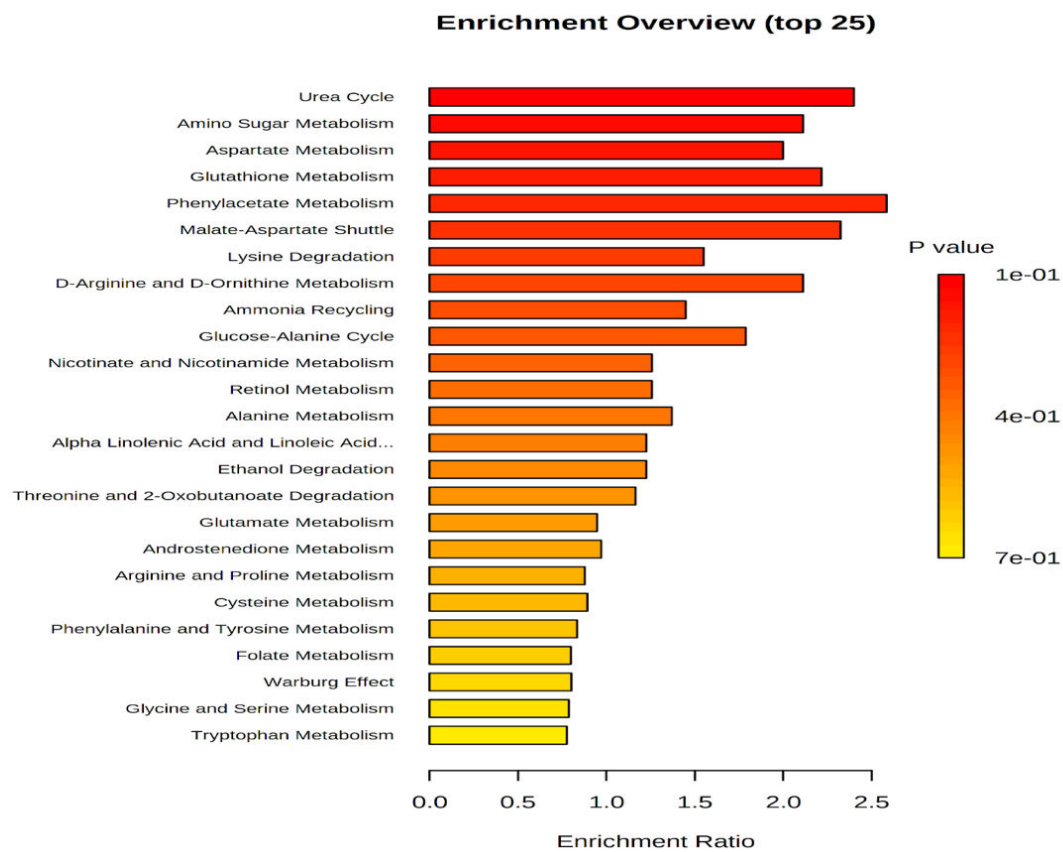

Figure S1: (A) Enrichment Analysis of Controls and Normoglycemic MetS

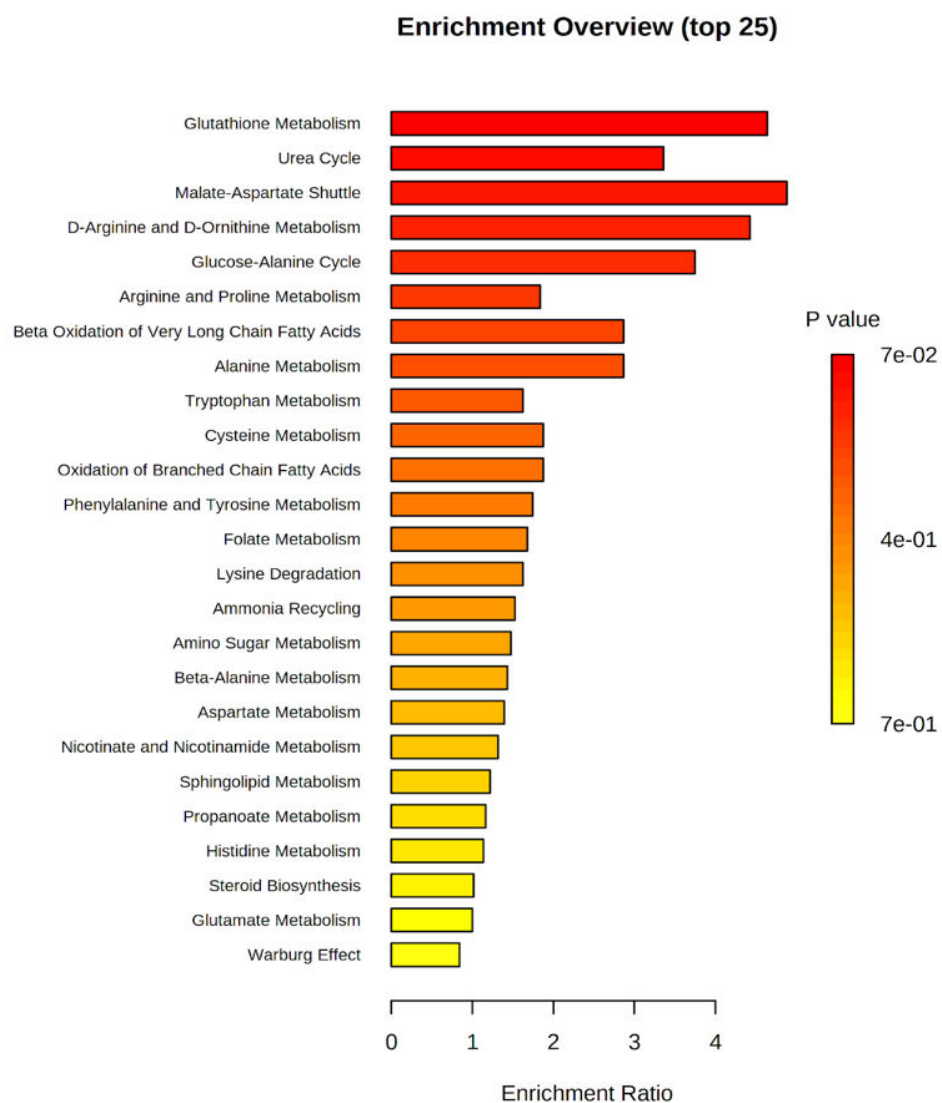

**Figure S1: (B) Enrichment Analysis of Normoglycemic MetS and Prediabetic MetS**

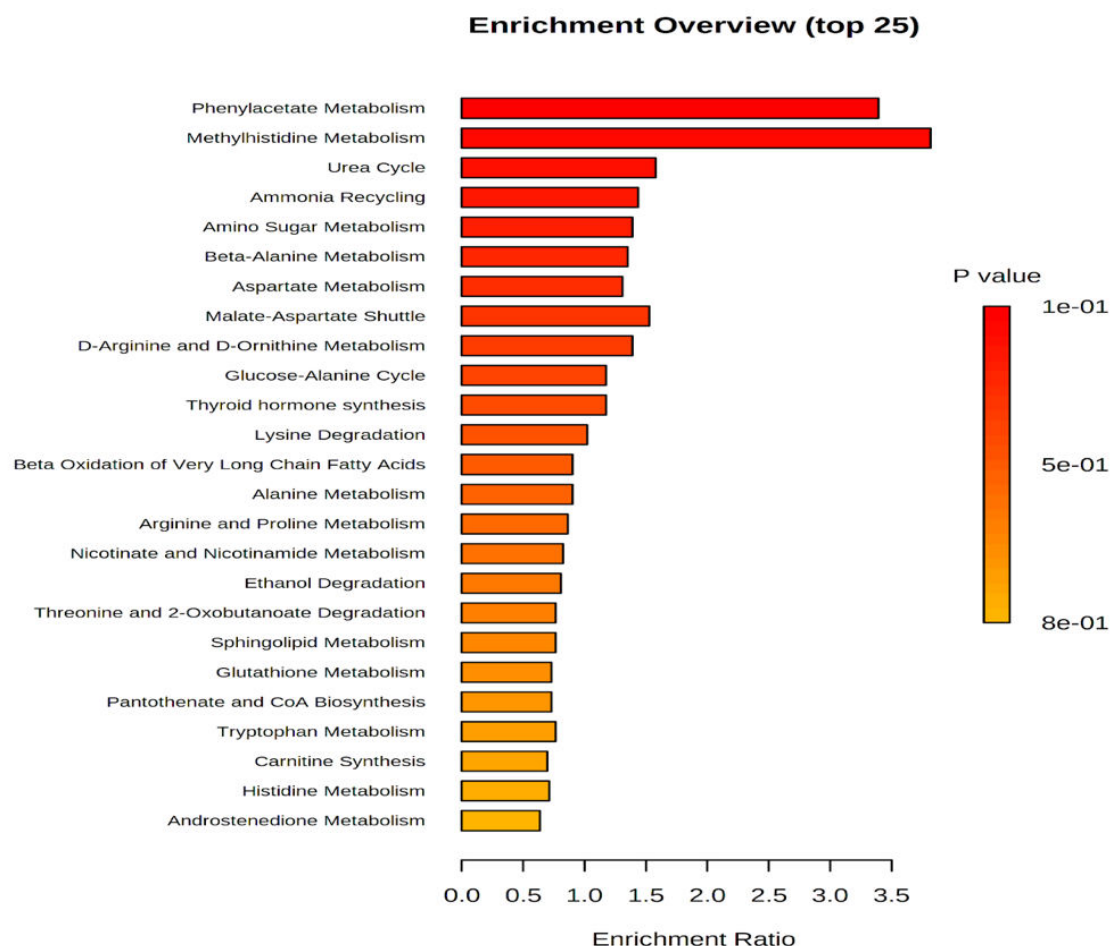

**Figure S1: (C) Enrichment Analysis of Controls and Prediabetic MetS**

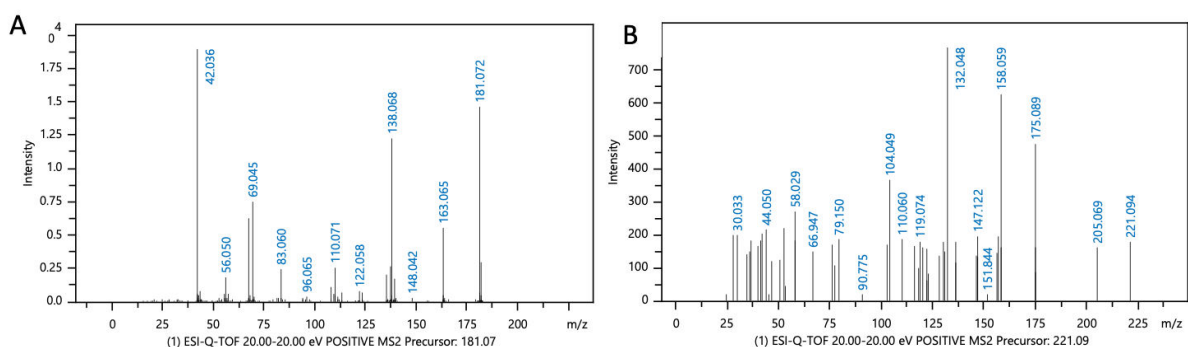

**Figure S2: Mass spectra for L-sorbose (A) and 5-Hydroxy-L-tryptophan (B)**

**Table S1:** Retention time and MS/MS

| Name                               | RT [min] | m/z measured | Mass measured |
|------------------------------------|----------|--------------|---------------|
| 1,3-Dimethyluric acid              | 9.75     | 197.06728    | 196.06        |
| 1-Methylhistidine                  | 1.85     | 170.09301    | 169.08574     |
| 17-Hydroxyprogesterone             | 22.39    | 331.22326    | 330.21598     |
| 2,4-Diaminobutyric acid            | 17.41    | 119.08565    | 118.07837     |
| 2-Furoylglycine                    | 3.34     | 170.04212    | 169.03485     |
| 2-Phenylbutyric acid               | 13.42    | 147.08064    | 164.08397     |
| 3,4,5-Trimethoxycinnamic acid      | 10.68    | 239.09168    | 238.08441     |
| 3-Hexenedioic acid                 | 3.59     | 145.04942    | 144.04214     |
| 3-Hydroxymethylglutaric acid       | 3.53     | 163.06006    | 162.05278     |
| 3-Indolepropionic acid             | 12.32    | 190.08703    | 189.07976     |
| 3-Methylindole                     | 9.3      | 132.08086    | 131.07359     |
| 3-Methylxanthine                   | 8.85     | 167.05661    | 166.04934     |
| 4-Aminohippuric acid               | 8.72     | 195.07649    | 194.06921     |
| 5-Hydroxy-L-tryptophan             | 9.54     | 221.09233    | 220.08505     |
| 5-Hydroxyindoleacetic acid         | 8.86     | 192.06586    | 191.05859     |
| 5-Hydroxylysine                    | 13.29    | 163.1118     | 162.10453     |
| 9-Methyluric acid                  | 8.85     | 183.05181    | 182.04454     |
| Acetic acid                        | 11.5     | 61.0283      | 60.02102      |
| All-trans-retinoic acid            | 15.24    | 301.21685    | 300.20957     |
| Allantoic acid                     | 1.9      | 177.06127    | 176.054       |
| Alpha-Tocopherol                   | 20.31    | 431.38435    | 430.37708     |
| Androstenedione                    | 15.01    | 287.2006     | 286.19332     |
| Androsterone                       | 17.81    | 291.23018    | 290.2229      |
| Benzamide                          | 8.98     | 122.05785    | 121.05057     |
| Benzoic acid                       | 5.9      | 123.04392    | 122.03664     |
| Biotin                             | 9.31     | 245.09839    | 244.09111     |
| Caffeine                           | 9.79     | 195.08803    | 194.08075     |
| Cinnamic acid                      | 8.85     | 149.06018    | 148.0529      |
| Creatine                           | 2.39     | 132.07678    | 131.0695      |
| Creatinine                         | 2.37     | 114.06616    | 113.05888     |
| D-Alanine                          | 2.39     | 90.05527     | 89.04799      |
| Deoxycholic acid glycine conjugate | 14.1     | 450.32217    | 449.31425     |
| DL-2-aminooctanoic acid            | 2.45     | 160.13322    | 159.12595     |
| Elaidic acid                       | 0.71     | 283.26283    | 282.25555     |
| Estradiol                          | 13.24    | 273.18528    | 272.178       |
| Gamma-terpinene                    | 16.95    | 137.13267    | 136.12539     |

|                            |       |           |           |
|----------------------------|-------|-----------|-----------|
| Glycerophosphocholine      | 2.19  | 280.09216 | 257.10294 |
| Glycine                    | 3.47  | 76.03958  | 75.0323   |
| Glycyl-L-leucine           | 9.25  | 189.12393 | 188.11666 |
| Guanidine                  | 2.66  | 60.05568  | 59.04841  |
| Heptadecanoic acid         | 26.01 | 271.2634  | 270.25612 |
| Hippuric acid              | 10.57 | 202.04784 | 179.05857 |
| Homoveratric acid          | 10.93 | 197.07839 | 196.07112 |
| Hyodeoxycholic acid        | 21.52 | 393.29695 | 392.28968 |
| Indole                     | 9.18  | 118.06528 | 117.05801 |
| Indole-3-carbinol          | 9.44  | 148.07568 | 147.0684  |
| Indoleacetic acid          | 11.62 | 176.0709  | 175.06363 |
| Indolelactic acid          | 11.61 | 206.08113 | 205.07385 |
| Isovalerylcarnitine        | 9.44  | 246.17081 | 245.16353 |
| L-Acetylcarnitine          | 3.94  | 204.12305 | 203.11578 |
| L-Arginine                 | 2.67  | 175.11914 | 174.11186 |
| L-Aspartyl-L-phenylalanine | 9.91  | 281.1136  | 280.10633 |
| L-Carnitine                | 2.63  | 162.11239 | 161.10511 |
| L-Glutamic acid            | 3.52  | 148.06045 | 147.05317 |
| L-Glutamine                | 10.02 | 147.07664 | 146.06937 |
| L-Histidine                | 1.82  | 156.07692 | 155.06964 |
| L-Kynurenine               | 9.4   | 209.09204 | 208.08477 |
| L-Lysine                   | 2.7   | 147.11326 | 146.10598 |
| L-Methionine               | 3.84  | 150.05858 | 149.0513  |
| L-Norleucine               | 4.76  | 132.10191 | 131.09463 |
| L-Proline                  | 2.67  | 116.0706  | 115.06333 |
| L-Sorbose                  | 9.67  | 181.07229 | 180.06501 |
| L-Threonine                | 9.73  | 120.06559 | 119.05832 |
| L-Tryptophan               | 9.82  | 205.09712 | 204.08984 |
| L-Valine                   | 2.68  | 118.08619 | 117.07892 |
| Linoleic acid              | 17.79 | 281.24755 | 280.24027 |
| m-Aminobenzoic acid        | 2.39  | 160.03472 | 137.04564 |
| m-Coumaric acid            | 5.82  | 165.05461 | 164.04734 |
| Medroxyprogesterone        | 16.47 | 345.24287 | 344.23559 |
| N,N-Dimethylformamide      | 2.66  | 74.06024  | 73.05296  |
| Nonadecanoic acid          | 29.91 | 299.29499 | 298.28772 |
| Normetanephine             | 2.33  | 184.09468 | 183.0874  |
| Nutriacholic acid          | 21.43 | 413.26578 | 390.27682 |
| o-Tyrosine                 | 3.81  | 182.0814  | 181.07413 |
| p-Octopamine               | 4.14  | 154.08392 | 153.07665 |

|                      |       |           |           |
|----------------------|-------|-----------|-----------|
| Paraxanthine         | 9.88  | 181.07204 | 180.06476 |
| PC(16:0/16:0)        | 20.32 | 734.56788 | 733.5606  |
| Phenylacetaldehyde   | 14.42 | 121.06472 | 120.05745 |
| Phenylacetic acid    | 12.9  | 137.05962 | 136.05235 |
| Pipecolic acid       | 1.79  | 130.08625 | 129.07898 |
| Pregnenolone         | 19.15 | 317.24822 | 316.24094 |
| Pregnenolone sulfate | 15.32 | 397.20054 | 396.19326 |
| Pyridoxamine         | 9.54  | 169.09724 | 168.08997 |
| Pyroglutamic acid    | 3.76  | 130.04995 | 129.04267 |
| Quinaldic acid       | 8.87  | 174.05556 | 173.04828 |
| Retinal              | 17.58 | 285.22164 | 284.21436 |
| Saccharopine         | 16.52 | 277.13545 | 276.12817 |
| Sphinganine          | 13.15 | 302.30576 | 301.29849 |
| Sphingosine          | 13.51 | 282.27948 | 299.28278 |
| Stearic acid         | 24.6  | 285.27764 | 284.27037 |
| Threonic acid        | 4.87  | 137.04577 | 136.03849 |
| Thymol               | 17.45 | 151.11199 | 150.10471 |
| Thyroxine            | 12.35 | 777.69442 | 776.68715 |
| Traumatic acid       | 10.83 | 229.14156 | 228.13429 |
| Trimethylamine       | 20.45 | 60.08098  | 59.0737   |
| Urea                 | 22.82 | 61.03982  | 60.03254  |
| Uric acid            | 4.94  | 169.03565 | 168.02837 |
| Uridine              | 14.87 | 245.07889 | 244.07161 |
| Vitamin D3           | 22.01 | 385.34666 | 384.33938 |

**Table S2: Chemical structures of metabolites**

| Name                          | Chemical Structure                                                                   |
|-------------------------------|--------------------------------------------------------------------------------------|
| 1,3-Dimethyluric acid         | 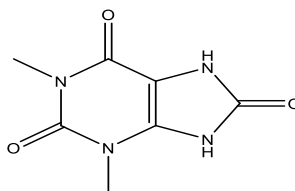   |
| 1-Methylhistidine             |    |
| 17-Hydroxyprogesterone        |    |
| 2,4-Diaminobutyric acid       |   |
| 2-Furoylglycine               |  |
| 2-Phenylbutyric acid          |  |
| 3,4,5-Trimethoxycinnamic acid |  |

|                                     |                                                                                      |
|-------------------------------------|--------------------------------------------------------------------------------------|
| <b>3-Hexenedioic acid</b>           | 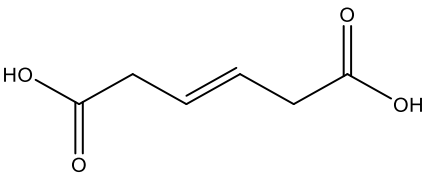   |
| <b>3-Hydroxymethylglutaric acid</b> |    |
| <b>3-Indolepropionic acid</b>       |    |
| <b>3-Methylindole</b>               |   |
| <b>3-Methylxanthine</b>             |  |
| <b>4-Aminohippuric acid</b>         |  |
| <b>5-Hydroxy-L-tryptophan</b>       |  |



|                                   |                                                                                      |
|-----------------------------------|--------------------------------------------------------------------------------------|
| <b>5-Hydroxyindoleacetic acid</b> | 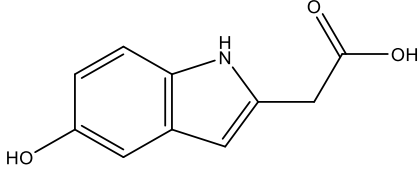   |
| <b>5-Hydroxylysine</b>            |    |
| <b>9-Methyluric acid</b>          |    |
| <b>Acetic acid</b>                |   |
| <b>All-trans-retinoic acid</b>    |  |
| <b>Allantoic acid</b>             |  |
| <b>Alpha-Tocopherol</b>           |  |

|                        |                                                                                      |
|------------------------|--------------------------------------------------------------------------------------|
| <b>Androstenedione</b> | 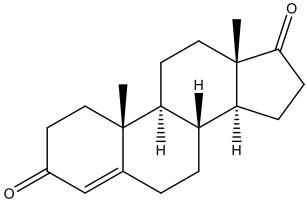   |
| <b>Androsterone</b>    |    |
| <b>Benzamide</b>       |    |
| <b>Benzoic acid</b>    |   |
| <b>Biotin</b>          |  |
| <b>Caffeine</b>        |  |
| <b>Cinnamic acid</b>   |  |

|                                           |                                                                                      |
|-------------------------------------------|--------------------------------------------------------------------------------------|
| <b>Creatine</b>                           | 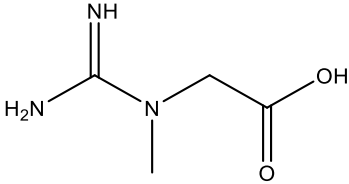   |
| <b>Creatinine</b>                         |    |
| <b>D-Alanine</b>                          |    |
| <b>Deoxycholic acid glycine conjugate</b> |   |
| <b>DL-2-aminooctanoic acid</b>            |  |
| <b>Elaidic acid</b>                       |  |
| <b>Estradiol</b>                          |  |

|                              |                                                                                      |
|------------------------------|--------------------------------------------------------------------------------------|
| <b>Gamma-terpinene</b>       | 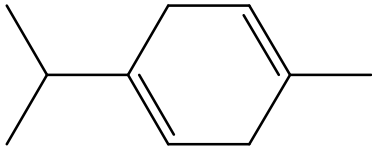   |
| <b>Glycerophosphocholine</b> |    |
| <b>Glycine</b>               |    |
| <b>Glycyl-L-leucine</b>      |   |
| <b>Guanidine</b>             |  |
| <b>Heptadecanoic acid</b>    |  |
| <b>Hippuric acid</b>         |  |

|                            |                                                                                      |
|----------------------------|--------------------------------------------------------------------------------------|
| <b>Homoveratric acid</b>   | 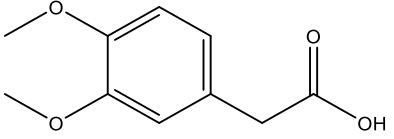   |
| <b>Hyodeoxycholic acid</b> |    |
| <b>Indole</b>              |    |
| <b>Indole-3-carbinol</b>   |   |
| <b>Indoleacetic acid</b>   |  |
| <b>Indolelactic acid</b>   |  |
| <b>Isovalerylcarnitine</b> |  |

|                                   |                                                                                      |
|-----------------------------------|--------------------------------------------------------------------------------------|
| <b>L-Acetylcarnitine</b>          | 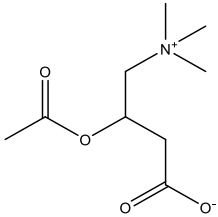   |
| <b>L-Arginine</b>                 |    |
| <b>L-Aspartyl-L-phenylalanine</b> |    |
| <b>L-Carnitine</b>                |   |
| <b>L-Glutamic acid</b>            |  |
| <b>L-Glutamine</b>                |  |
| <b>L-Histidine</b>                |  |

|                     |                                                                                      |
|---------------------|--------------------------------------------------------------------------------------|
| <b>L-Kynurenine</b> | 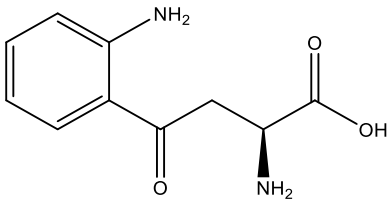   |
| <b>L-Lysine</b>     |    |
| <b>L-Methionine</b> |    |
| <b>L-Norleucine</b> |   |
| <b>L-Proline</b>    |  |
| <b>L-Sorbose</b>    |  |
| <b>L-Threonine</b>  |  |

|                              |                                                                                      |
|------------------------------|--------------------------------------------------------------------------------------|
| <b>L-Tryptophan</b>          | 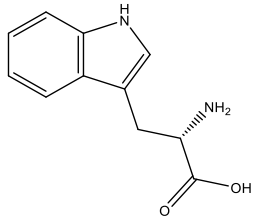   |
| <b>L-Valine</b>              |    |
| <b>Linoleic acid</b>         |    |
| <b>m-Aminobenzoic acid</b>   |   |
| <b>m-Coumaric acid</b>       |  |
| <b>Medroxyprogesterone</b>   |  |
| <b>N,N-Dimethylformamide</b> |  |



|                          |                                                                                      |
|--------------------------|--------------------------------------------------------------------------------------|
| <b>Nonadecanoic acid</b> | 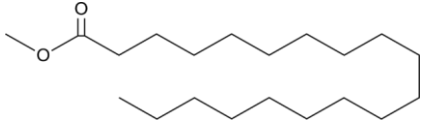   |
| <b>Normetanephrine</b>   |    |
| <b>Nutriacholic acid</b> |    |
| <b>o-Tyrosine</b>        |   |
| <b>p-Octopamine</b>      |  |
| <b>Paraxanthine</b>      |  |
| <b>PC(16:0/16:0)</b>     |  |

|                             |                                                                                      |
|-----------------------------|--------------------------------------------------------------------------------------|
| <b>Phenylacetaldehyde</b>   | 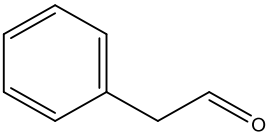   |
| <b>Phenylacetic acid</b>    |    |
| <b>Pipecolic acid</b>       |    |
| <b>Pregnenolone</b>         |   |
| <b>Pregnenolone sulfate</b> |  |
| <b>Pyridoxamine</b>         |  |
| <b>Pyroglutamic acid</b>    |  |

|                       |                                                                                      |
|-----------------------|--------------------------------------------------------------------------------------|
| <b>Quinaldic acid</b> | 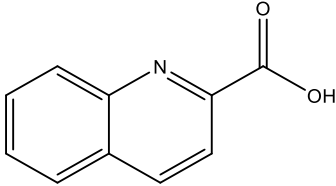   |
| <b>Retinal</b>        |    |
| <b>Saccharopine</b>   |    |
| <b>Sphinganine</b>    |   |
| <b>Sphingosine</b>    |  |
| <b>Stearic acid</b>   |  |
| <b>Threonic acid</b>  |  |

|                       |                                                                                      |
|-----------------------|--------------------------------------------------------------------------------------|
| <b>Thymol</b>         | 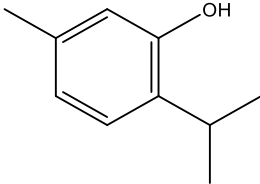   |
| <b>Thyroxine</b>      |    |
| <b>Trimethylamine</b> |    |
| <b>Urea</b>           |   |
| <b>Uric acid</b>      |  |
| <b>Uridine</b>        |  |
| <b>Vitamin D3</b>     |  |

|                                           |                                                                                      |
|-------------------------------------------|--------------------------------------------------------------------------------------|
| <b>Pantothenic acid</b>                   | 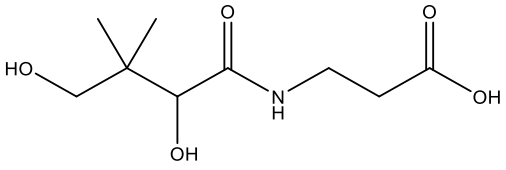   |
| <b>Arginine</b>                           |    |
| <b>Phenylalanine</b>                      |    |
| <b>Lysine</b>                             |   |
| <b>Glutathione</b>                        |  |
| <b>Glyoxylate Dicarboxylate Conjugate</b> |  |
